# Supplementary material for: Vectored immunoprophylaxis and treatment of SARS-CoV-2 infection in a preclinical model
Source: PubMed Central journal article supplement — Proc Natl Acad Sci U S A. 2023 May 30;120(23):e2303509120. doi: 10.1073/pnas.2303509120 (PMC10266030; doi:10.1073/pnas.2303509120), 2023-05-30
Supplement: pnas.2303509120.sapp.pdf [file pnas.2303509120.sapp.pdf]

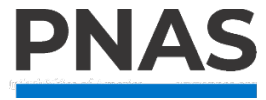

## **Supporting Information for**

Vectored immunoprophylaxis and treatment of SARS-CoV-2 in a preclinical model

Takuya Tada, Julia Minnee and Nathaniel R. Landau

Corresponding author: Nathaniel R. Landau

Email: [nathaniel.landau@med.nyu.edu](mailto:nathaniel.landau@med.nyu.edu)

### **This PDF file includes:**

Figures S1 to S4

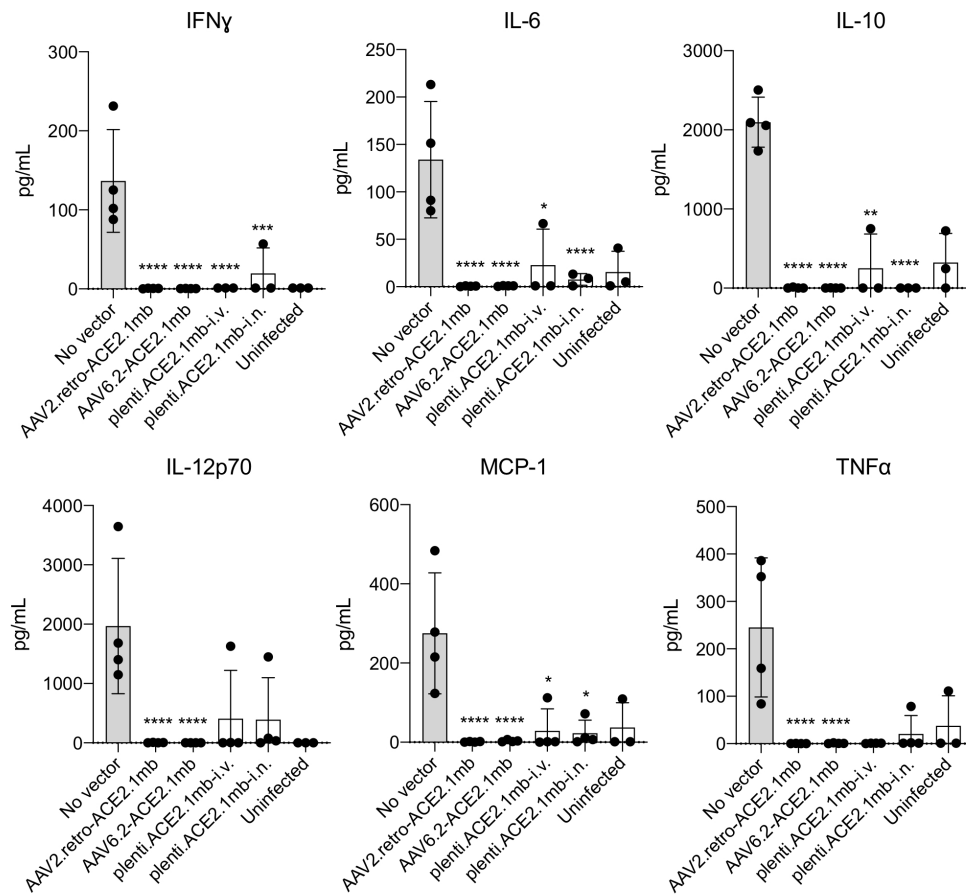

**Fig. S1. Intranasal injected AAV2.retro, AAV6.2-decoys and lentivirus-based ACE2.1mb didn't induce any inflammatory cytokine secretion.**

Mice (n=4) were treated with the decoy-expressing AAV vectors ( $1 \times 10^{12}$  vg) or decoy-expressing lentiviral vector ( $5 \times 10^6$  IU). After 3 (AAV) or 7 days (lentiviral vector), the mice were challenged with SARS-CoV-2 WA1/2020 and 3-dpi the levels of IFN $\gamma$ , TNF $\alpha$ , IL-10, IL-6, MCP-1 and IL-12p70 in lung were measured by cytokine beads array. The Y-axis shows the concentration of each cytokine. The experiment was done twice with similar results. Confidence intervals are shown as the mean  $\pm$  SD.

\*P  $\leq$  0.05, \*\*P  $\leq$  0.01, \*\*\*P  $\leq$  0.001, \*\*\*\*P  $\leq$  0.0001.

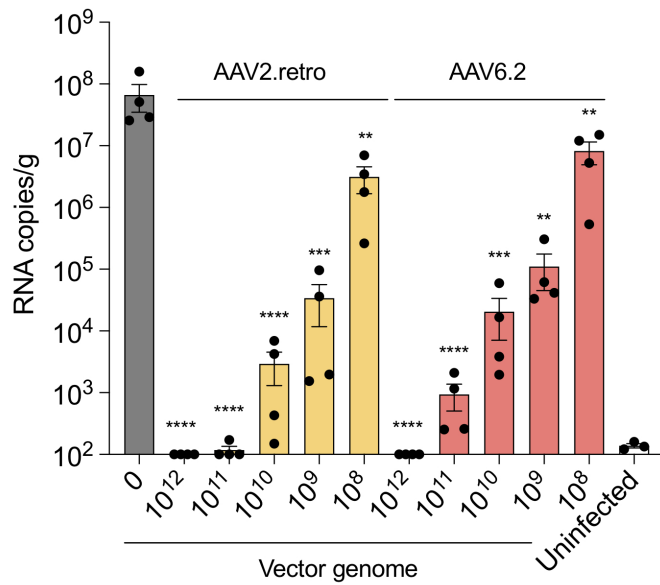

**Fig. S2. AAV-Decoy protects mice from SARS-CoV-2 infection.**

Different doses of decoy-expressing AAV vectors ( $1 \times 10^{12}$ ,  $1 \times 10^{11}$ ,  $1 \times 10^{10}$ ,  $1 \times 10^9$ ,  $1 \times 10^8$  vg) were administered to hACE2 K18 Tg (n=4) by i.n. instillation. 3 days post-AAV injection, mice were challenged with  $2 \times 10^4$  PFU of SARS-CoV-2 WA1/2020. At 3-dpi, subgenomic viral E gene RNA in the lung were quantified. Confidence intervals are shown as the mean  $\pm$  SD. \*\* $P \leq 0.01$ , \*\*\* $P \leq 0.001$ , \*\*\*\* $P \leq 0.0001$ .

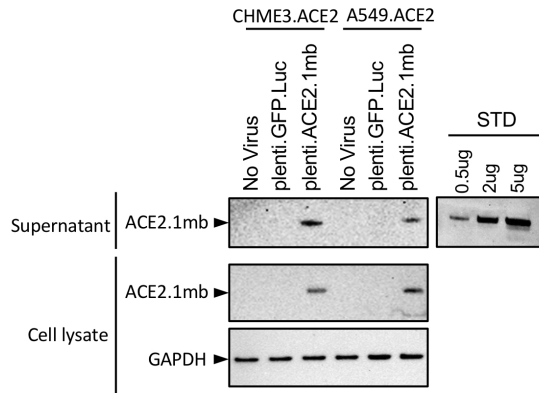

**Fig. S3. Lentivirus-based ACE2.1mb was secreted in different cell lines.**

CHME3.ACE2 and A549.ACE2 cells were transduced with decoy-expressing lentiviral vectors at an MOI of 0.5. 3-dpi, decoy protein secreted into the supernatant was pulled-down on nickel-nitrilotriacetic acid-agarose beads and bead-bound decoy protein was detected on an immunoblot probed with His-tag antibody. Decoy protein in the cell lysates is shown below with GAPDH as a loading control.

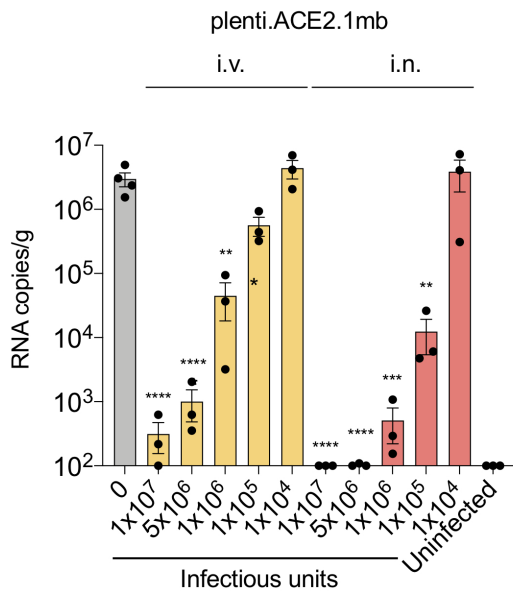

**Fig. S4. Lentivirus-based ACE2.1mb protected mice from SARS-CoV-2 infection.**

hACE2 K18 Tg mice (n=3) were injected i.v. or i.n. with different amounts of decoy-expressing lentiviral vectors (1 X 10<sup>7</sup>, 1 X 10<sup>6</sup>, 1 X 10<sup>5</sup>, 1 X 10<sup>4</sup> IU). One week later, the mice were challenged with 2 X 10<sup>4</sup> PFU SARS-COV-2. At 3-dpi, lung subgenomic viral E RNA was quantified by RT-qPCR. Confidence intervals are shown as the mean ± SD. \*\*P ≤ 0.01, \*\*\*P ≤ 0.001, \*\*\*\*P ≤ 0.0001.
